# Supplementary material for: Near-infrared optical and X-ray computed tomography dual-modal imaging probe based on novel lanthanide-doped K0.3Bi0.7F2.4upconversion nanoparticles
Source: Royal Society of Chemistry journal article supplement (doi:10.1039/c7nr06758e), 2017-12-14
Supplement: c7nr06758e1.pdf [file c7nr06758e1.pdf]

## Supporting Information

Near-infrared optical and X-ray computed tomography dual-modal  
imaging probe based on novel lanthanide-Doped  $K_{0.3}Bi_{0.7}F_{2.4}$   
upconversion nanoparticles

Ran An,<sup>a,#</sup> Pengpeng Lei,<sup>a,b,#</sup> Peng Zhang,<sup>c</sup> Xia Xu,<sup>a,b</sup> Jing Feng,<sup>a,\*</sup> and Hongjie Zhang<sup>a,\*</sup>

<sup>a</sup> *State Key Laboratory of Rare Earth Resource Utilization, Changchun Institute of Applied Chemistry, Chinese Academy of Sciences, 5625 Renmin Street, Changchun 130022, China*

<sup>b</sup> *University of Chinese Academy of Sciences, Beijing 100049, China*

<sup>c</sup> *Department of Radiology, The Second Hospital of Jilin University, Changchun 130041, China*

<sup>#</sup> *These authors contributed equally to this work*

\* Corresponding authors. Tel.: +86 431 85262127; fax: +86 431 85698041.

E-mail addresses: [fengj@ciac.ac.cn](mailto:fengj@ciac.ac.cn) (J. Feng), [hongjie@ciac.ac.cn](mailto:hongjie@ciac.ac.cn) (H. Zhang).

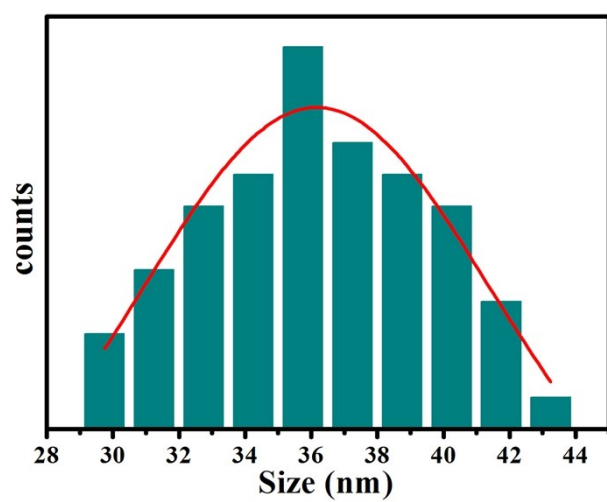

**Fig. S1** The size histogram of BYT UCNPs.

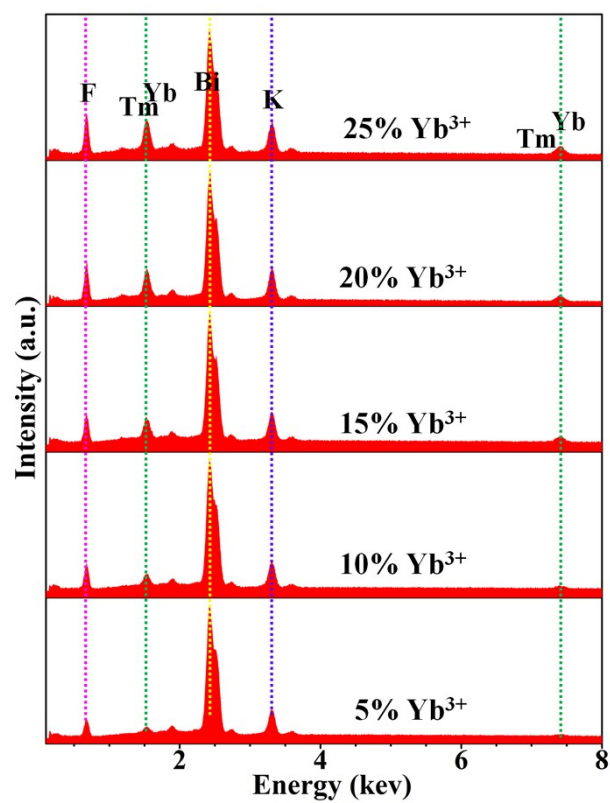

**Fig. S2** Energy-dispersive X-ray (EDX) spectra of  $K_{0.3}Bi_{0.7}F_{2.4}:x\% Yb^{3+}/0.5\% Tm^{3+}$  UCNPs ( $x = 5, 10, 15, 20, 25$ ).

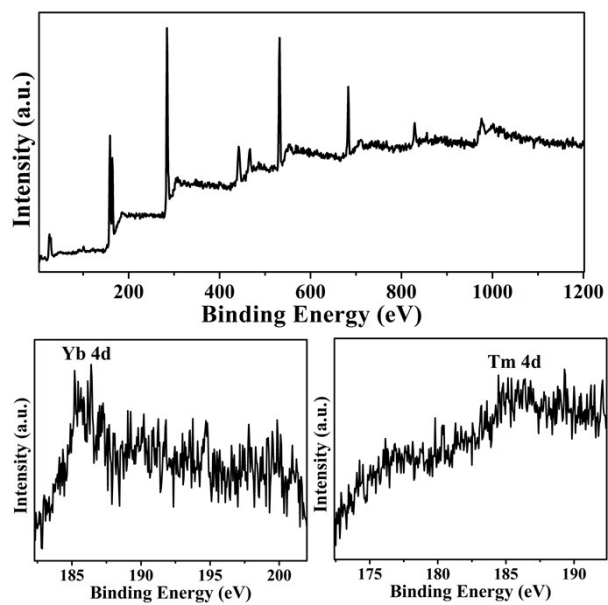

**Fig. S3** X-ray photoelectron spectroscopy (XPS) analysis of BYT UCNPs. (a) survey, (b) Yb 4d, and (c) Tm 4d.

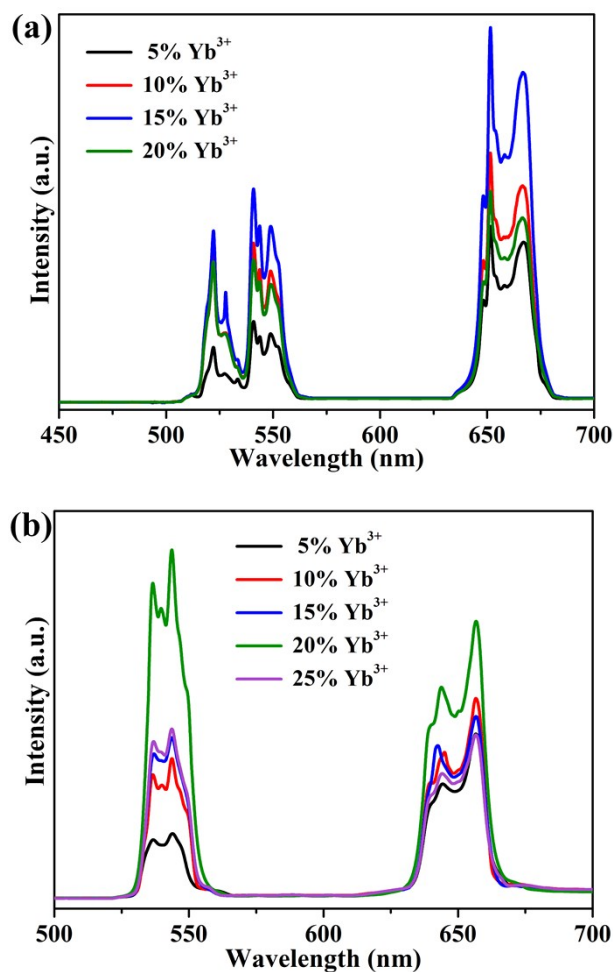

**Fig. S4** (a) The UCL spectra of  $K_{0.3}Bi_{0.7}F_{2.4}:x\% Yb^{3+}/2\% Er^{3+}$  ( $x = 5, 10, 15, 20$ ). (b) The UCL spectra of  $K_{0.3}Bi_{0.7}F_{2.4}:x\% Yb^{3+}/2\% Ho^{3+}$  ( $x = 5, 10, 15, 20, 25$ ).

As shown in Fig. S4(a),  $K_{0.3}Bi_{0.7}F_{2.4}:x\% Yb^{3+}/2\% Er^{3+}$  ( $x = 5, 10, 15, 20, 25$ ) exhibit two UC bands of green and red emissions in the spectroscopic range of 510-565 nm and 635-680 nm, which can be assigned to the  $^2H_{11/2}/^4S_{3/2} \rightarrow ^4I_{15/2}$  and  $^4F_{9/2} \rightarrow ^4I_{15/2}$  transitions of  $Er^{3+}$  ions. The intensity of emission peaks increases with  $Yb^{3+}$  ions concentration changing from 5 to 15%, and then decrease at the  $Yb^{3+}$  concentration of 20%. It is worthwhile to mention that a yellow emission was observed in  $K_{0.3}Bi_{0.7}F_{2.4}:15\% Yb^{3+}/2\% Er^{3+}$  by the naked eyes.

In the emission spectra of  $K_{0.3}Bi_{0.7}F_{2.4}:x\% Yb^{3+}/2\% Ho^{3+}$  ( $x = 5, 10, 15, 20, 25$ ) (Fig. S4 (b)), the green emission at 525-562 nm corresponds to  $^5S_2 \rightarrow ^5I_8$  transitions and the red

emission region at 628-677 nm is ascribed to  $^5F_5 \rightarrow ^5I_8$  transition of  $\text{Ho}^{3+}$ . Variations in the  $\text{Yb}^{3+}$  concentration (5-25%) lead to corresponding changes in the green ( $^5S_2 \rightarrow ^5I_8$ ) and red ( $^5F_5 \rightarrow ^5I_8$ ) spectral region, accompanied by changes of fluorescence emission. The UCL intensity achieved the maximum when the  $\text{Yb}^{3+}$  ions concentration reaches at 20%.

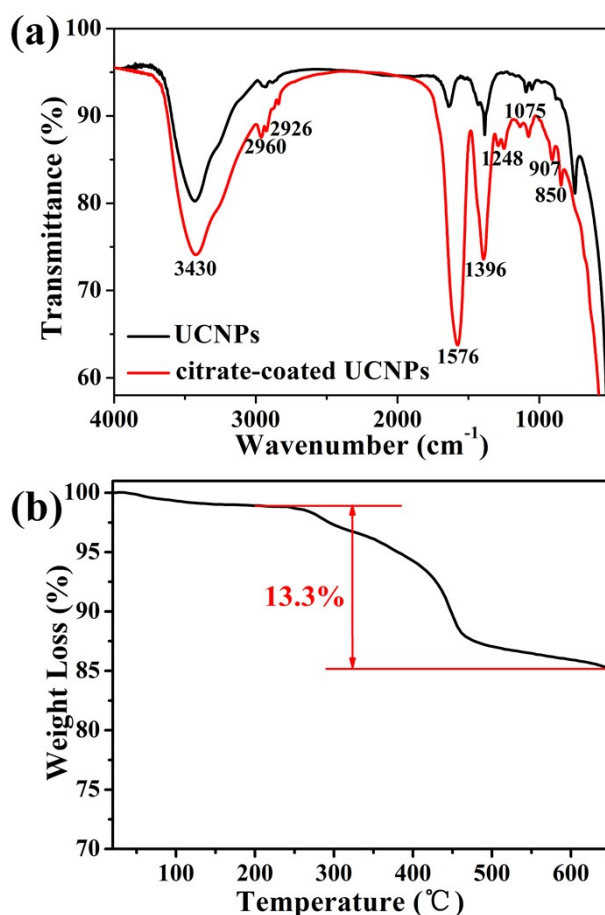

**Fig. S5** (a) FTIR spectra of BYT UCNPs and citrate-coated BYT UCNPs. (b) Thermogravimetric analysis (TGA) of citrate-coated BYT UCNPs.

Fig. S5(a) shows the BYT UCNPs and citrate-coated BYT UCNPs both have the broad absorption band located at  $3430\text{ cm}^{-1}$  corresponding to the O–H stretching vibration of water on the surface. For the citrate-coated BYT UCNPs, the weak absorption peaks ( $2960$  and  $2926\text{ cm}^{-1}$ ) and the strong absorption peaks ( $1576$  and  $1396\text{ cm}^{-1}$ ) are attributed to the C–H bond vibration of the surface coated citric acid molecules. The weak absorption peaks at  $1248$  and  $1075\text{ cm}^{-1}$  are attributed to the C–C bond vibration of citric acid molecules. In addition, the O–H bond vibration of carboxylic group was displayed at  $907$  and  $850\text{ cm}^{-1}$ . On the basis of the above results, the citric acid ligands have been successfully coated on the surface of UCNPs. The weight loss of citrate-coated BYT UCNPs was about 13.3 wt%, indicating the

amount of citric acid molecules on the surface of UCNPs (Fig. S5(b)).



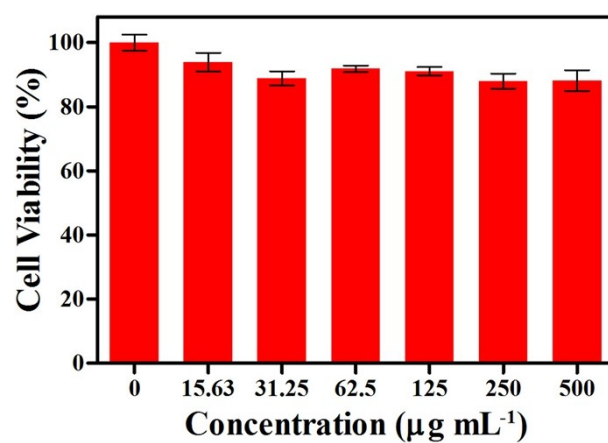

**Fig. S6** *In vitro* cell viability of HeLa cells after incubation with citrate-coated BYT UCNPs for 24 h using standard MTT colorimetric assay.

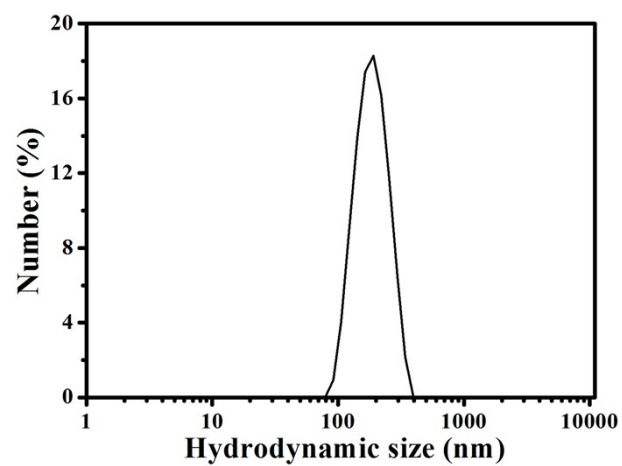

**Fig. S7** The hydrodynamic size of BYT UCNPs.

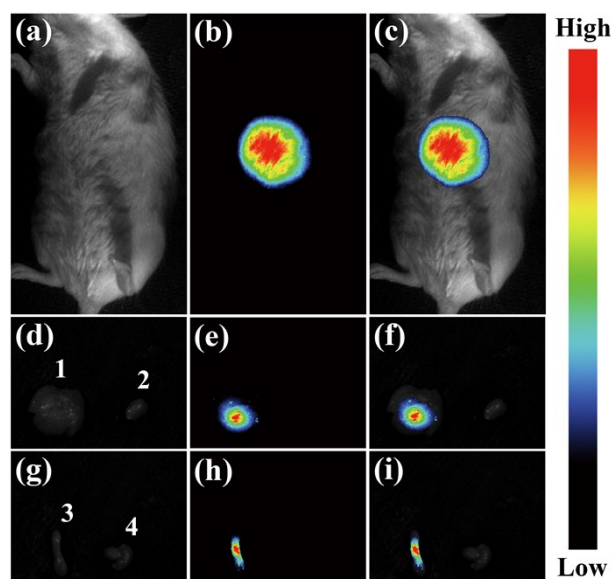

**Fig. S8** Whole-body NIR-to-NIR UCL imaging of a mouse after intravenous injection of the citrate-coated BYT UCNPs. (a, d, g) bright-field images. (b, e, h) UCL images. (c, f, i) corresponding overlay bright-field and UCL images of (a, d, g and b, e, h). The (d-i) images are *ex vivo* UCL imaging after injection for 2 h. 1, liver; 2, heart; 3, spleen; 4, kidney.

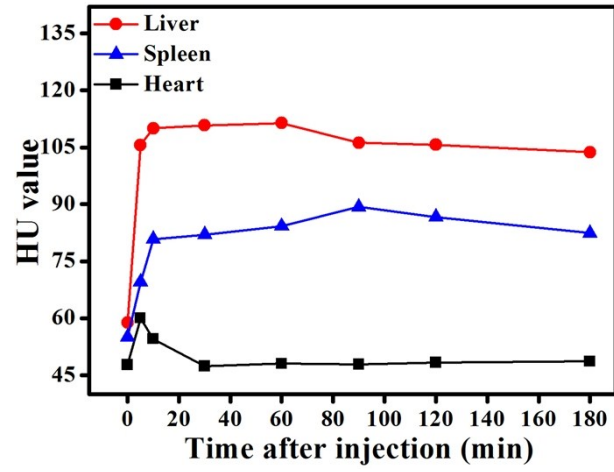

**Fig. S9** The HU values of different organs of a mouse after intravenous injection of citrate-coated BYT UCNPs at timed intervals.
